# Supplementary material for: Preoperative echocardiography as a predictor of spinal anesthesia-induced hypotension in older patients with mild left ventricular diastolic dysfunction: a retrospective observational study
Source: PubMed Central journal article supplement — Anesth Pain Med (Seoul). 2024 Apr 30;19(2):134–43. doi: 10.17085/apm.23161 (PMC11089297; doi:10.17085/apm.23161), 2024-04-30
Supplement: apm-23161-Supplementary-Table-1.pdf [file apm-23161-Supplementary-Table-1.pdf]

**Supplementary table 1.** Patient characteristics and intraoperative data for the patients with and without significant SAH

|                          | Total (N = 163)  | Patients without significant SAH (n = 133) | Patients with significant SAH (n = 30) | P value |
|--------------------------|------------------|--------------------------------------------|----------------------------------------|---------|
| Age (years)              | 72.0 ± 5.1       | 71.8 ± 5.1                                 | 73.2 ± 5.1                             | 0.155   |
| Height (cm)              | 166.3 ± 6.2      | 166.5 ± 6.3                                | 165.4 ± 6.0                            | 0.393   |
| Weight (kg)              | 65.6 ± 8.3       | 65.3 ± 8.3                                 | 66.5 ± 8.7                             | 0.490   |
| BMI (kg/m <sup>2</sup> ) | 23.7 ± 2.4       | 23.5 ± 2.3                                 | 24.5 ± 2.6                             | 0.036   |
| ASA physical status      |                  |                                            |                                        | 0.121   |
| I                        | 39 (23.9)        | 36 (27.1)                                  | 3 (10.0)                               |         |
| II                       | 105 (64.4)       | 83 (62.4)                                  | 22 (73.3)                              |         |
| III                      | 19 (11.7)        | 14 (10.5)                                  | 5 (16.7)                               |         |
| Past history             |                  |                                            |                                        |         |
| Cerebrovascular disease  | 17 (10.4)        | 13 (9.8)                                   | 4 (13.3)                               | 0.565   |
| Myocardial infarction    | 12 (7.4)         | 8 (6.0)                                    | 4 (13.3)                               | 0.166   |
| Hypertension             | 83 (50.9)        | 65 (48.9)                                  | 18 (60.0)                              | 0.271   |
| Diabetes mellitus        | 33 (20.2)        | 27 (20.3)                                  | 6 (20.2)                               | 0.970   |
| Pulmonary disease        | 24 (14.7)        | 19 (14.3)                                  | 5 (16.7)                               | 0.747   |
| Renal disease            | 5 (3.1)          | 4 (3.0)                                    | 1 (3.3)                                | 0.926   |
| Liver disease            | 5 (3.1)          | 4 (3.0)                                    | 1 (3.3)                                | 0.926   |
| Dose of bupivacaine (mg) | 12.0 (11.0-12.0) | 12.0 (12.0-12.0)                           | 12.0 (12.0-12.0)                       | 0.210   |
| Level of sensory block   | T10 (T8-T10)     | T10 (T8-T10)                               | T8 (T6-T10)                            | 0.002   |

Data are mean ± standard deviation, median (interquartile range), or number (%). SAH, spinal anesthesia-induced hypotension; BMI, body mass index; ASA, American Society of Anesthesiologists.
