# Supplementary material for: Preoperative echocardiography as a predictor of spinal anesthesia-induced hypotension in older patients with mild left ventricular diastolic dysfunction: a retrospective observational study
Source: PubMed Central journal article supplement — Anesth Pain Med (Seoul). 2024 Apr 30;19(2):134–43. doi: 10.17085/apm.23161 (PMC11089297; doi:10.17085/apm.23161), 2024-04-30
Supplement: apm-23161-Supplementary-Table-2.pdf [file apm-23161-Supplementary-Table-2.pdf]

**Supplementary table 2.** Patient characteristics and intraoperative data for the patients with and without significant SAH

|                                      | Total (N = 163)   | Patients without significant SAH (n = 133) | Patients with significant SAH (n = 30) | P value |
|--------------------------------------|-------------------|--------------------------------------------|----------------------------------------|---------|
| LV ejection fraction (%)             | 61.3 ± 3.3        | 61.5 ± 3.3                                 | 60.7 ± 3.2                             | 0.812   |
| Mitral inflow E velocity (cm/sec)    | 62.5 ± 14.3       | 64.5 ± 14.5                                | 53.6 ± 9.2                             | 0.006   |
| Mitral inflow A velocity (cm/sec)    | 80.2 ± 16.1       | 80.9 ± 16.5                                | 78.1 ± 14.1                            | 0.309   |
| E/A ratio                            | 0.8 (0.7-0.9)     | 0.8 (0.7-0.9)                              | 0.7 (0.6-0.8)                          | 0.002   |
| Deceleration time (ms)               | 218 (187.0-248.5) | 218 (187.3-245.0)                          | 221.5 (184.0-275.0)                    | 0.548   |
| Medial E' (cm/sec)                   | 6.1 (5.0-7.2)     | 6.4 (5.3-7.3)                              | 6.0 (4.2-6.4)                          | 0.001   |
| Lateral E' (cm/sec)                  | 7.8 (6.4-9.2)     | 8.0 (6.8-9.5)                              | 6.9 (5.5-8.7)                          | 0.007   |
| E/E' average                         | 8.7 (7.6-10.7)    | 8.6 (7.6-10.7)                             | 8.8 (7.9-10.5)                         | 0.589   |
| LA volume index (mL/m <sup>2</sup> ) | 32.9 ± 7.8        | 32.6 ± 7.7                                 | 34.7 ± 7.8                             | 0.894   |
| TR velocity (m/s)                    | 2.2 (2.0-2.5)     | 2.2 (2.0-2.5)                              | 2.2 (2.0-2.5)                          | 0.820   |

Data are mean ± standard deviation, median (interquartile range), or number (%). (%). SAH, spinal anesthesia-induced hypotension; LV, left ventricle; LA, left atrium; TR, tricuspid regurgitation.
